# Supplementary material
Source: ML conference proceedings conference paper supplement (https://openreview.net/forum?id=ntmfqeiDcN)
Supplement: supplementary_material [file attachment]

# Supplementary Materials: Seeing Text in the Dark: Algorithm and Benchmark

Anonymous Authors

## 1 ABLATION STUDY ON THE NUMBER OF TEXT COMPONENT

Table 1 suggests that a deficient number of text components in the TSR adversely affects the holistic representation of text. An increase in text components leads to a reduction in the inference speed of our method. Nonetheless, the F1-scores stabilize and do not show further improvement beyond a threshold of 60 components for both datasets. Hence, we select 60 as the optimal number of text components, ensuring adequate representation without compromising inference speed.

Table 1: Explorations of the number of text component

| Component | LAtED |      |      |       | CTW1500 |      |      |       |
|-----------|-------|------|------|-------|---------|------|------|-------|
|           | FPS   | P(%) | R(%) | F1(%) | FPS     | P(%) | R(%) | F1(%) |
| N=40      | 10.4  | 81.7 | 54.0 | 65.0  | 10.6    | 85.5 | 82.8 | 84.1  |
| N=50      | 10.2  | 82.1 | 55.0 | 65.9  | 10.4    | 86.0 | 83.1 | 84.5  |
| N=60      | 9.9   | 82.8 | 55.4 | 66.4  | 10.0    | 86.2 | 83.5 | 84.8  |
| N=70      | 9.8   | 82.8 | 55.4 | 66.4  | 9.8     | 86.2 | 83.5 | 84.8  |
| N=80      | 9.5   | 82.8 | 55.4 | 66.4  | 9.6     | 86.2 | 83.5 | 84.8  |

## 2 MORE VISUAL EXAMPLES

For more comparison against enhancement-based methods. Please check Figure 1, Figure 2 and Figure 3. For detection results on normal light dataset. Please check Figure 4.

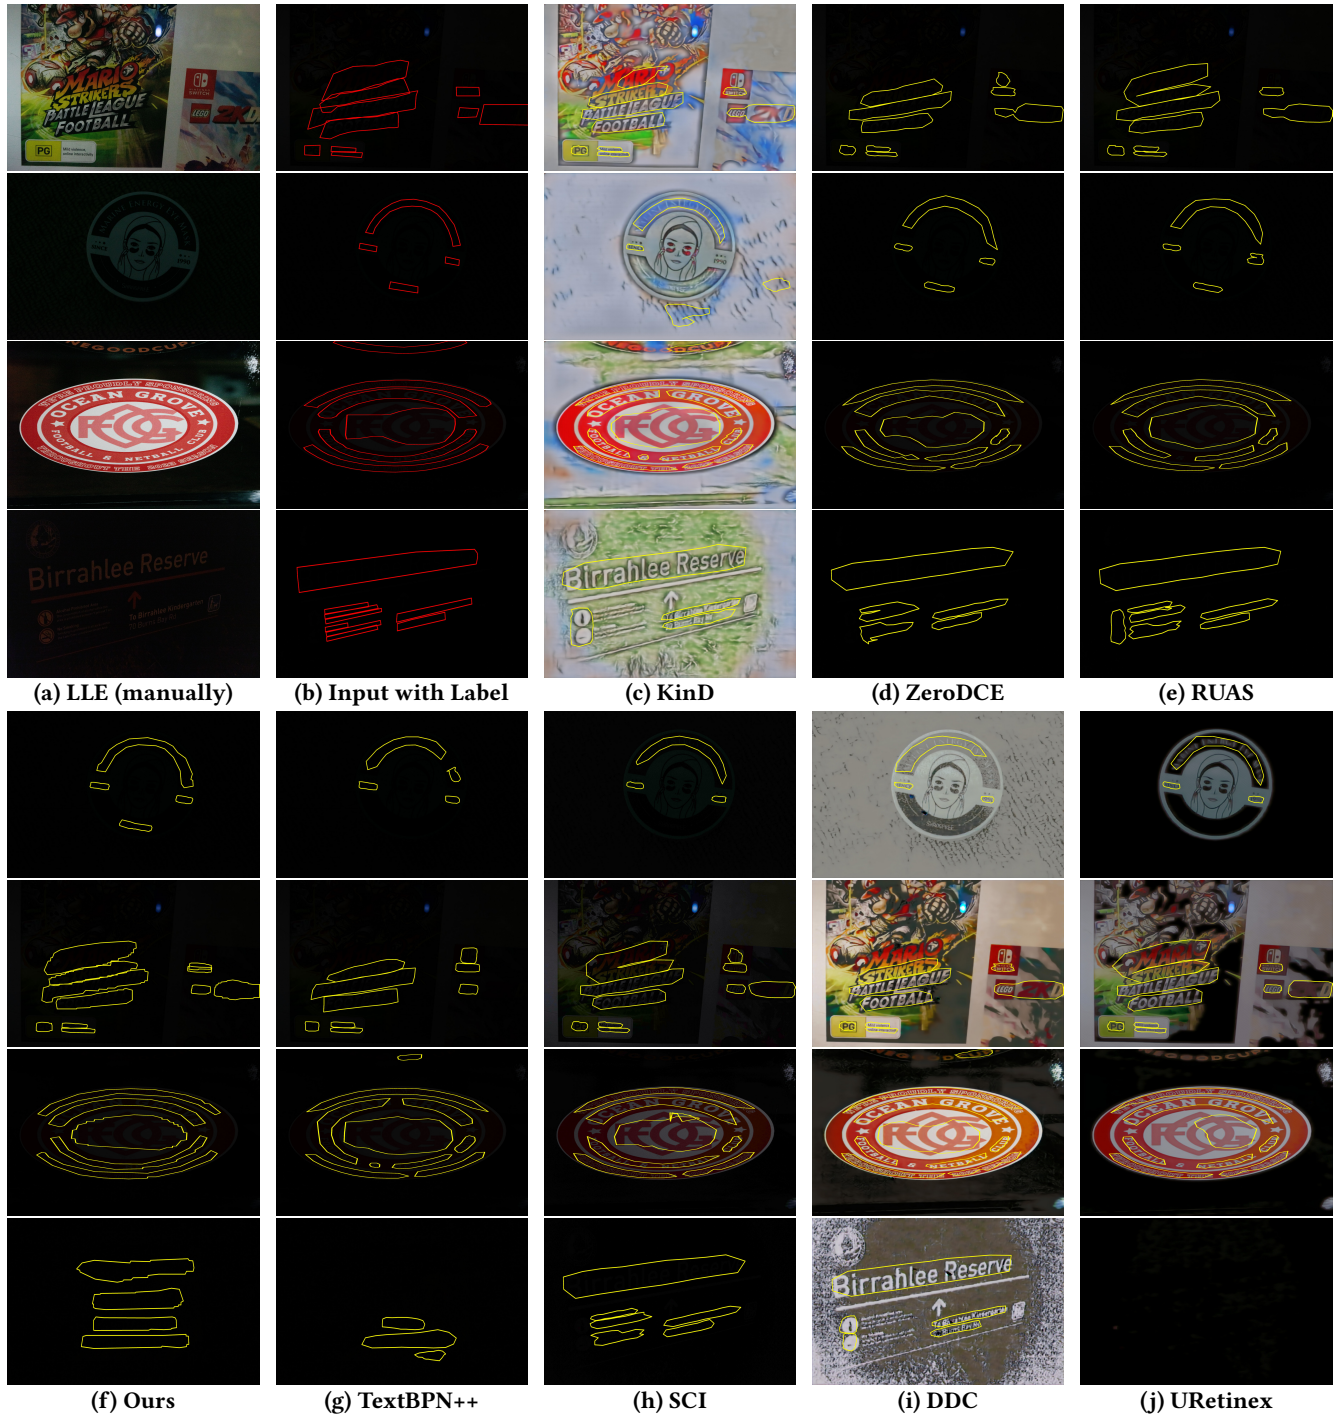

**Figure 1: More Comparison against enhancement-based methods (Part 1).** (a) Manually enhanced image. (b) Input low-light image with label(c)-(e) and (h)-(j). Fine-tuned results of low-light enhancement methods with TextBPN++. (g) Fully Supervised TextBPN++. (f) Our method.

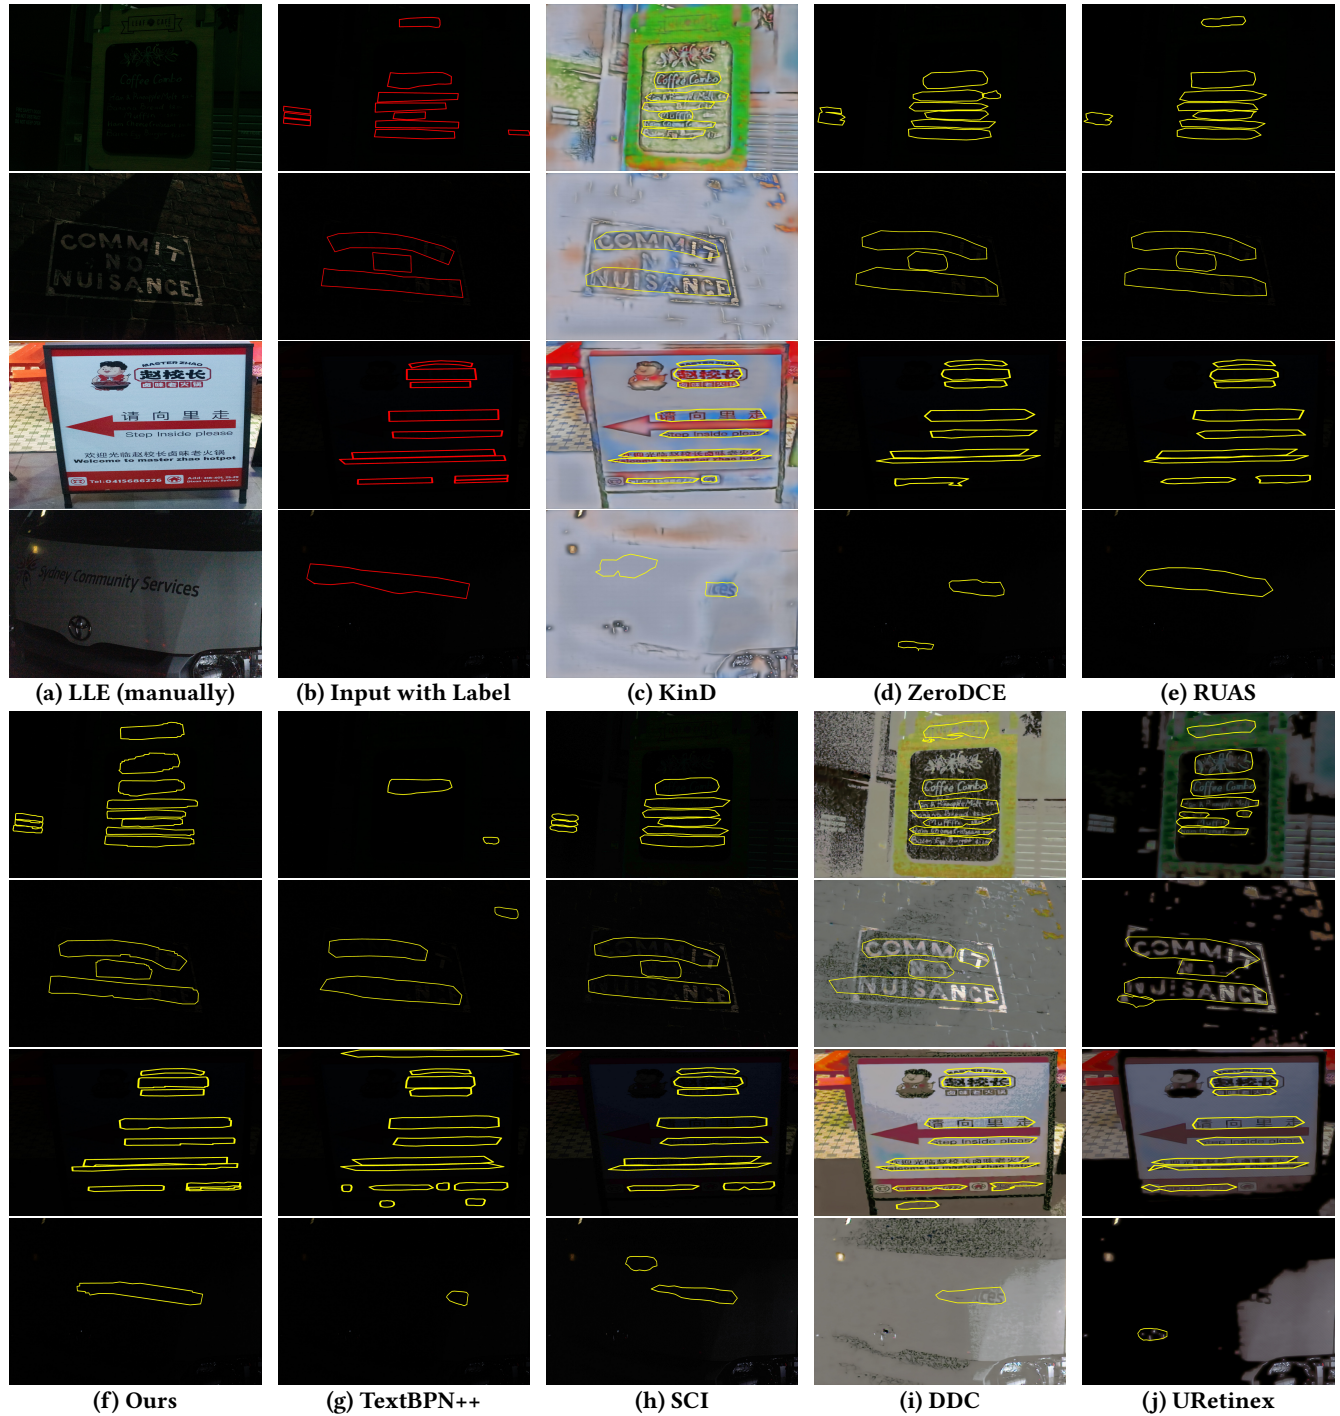

Figure 2: More Comparison against enhancement-based methods (Part 2). (a) Manually enhanced image. (b) Input low-light image with label(c)-(e) and (h)-(j). Fine-tuned results of low-light enhancement methods with TextBPN++. (g) Fully Supervised TextBPN++. (f) Our method.



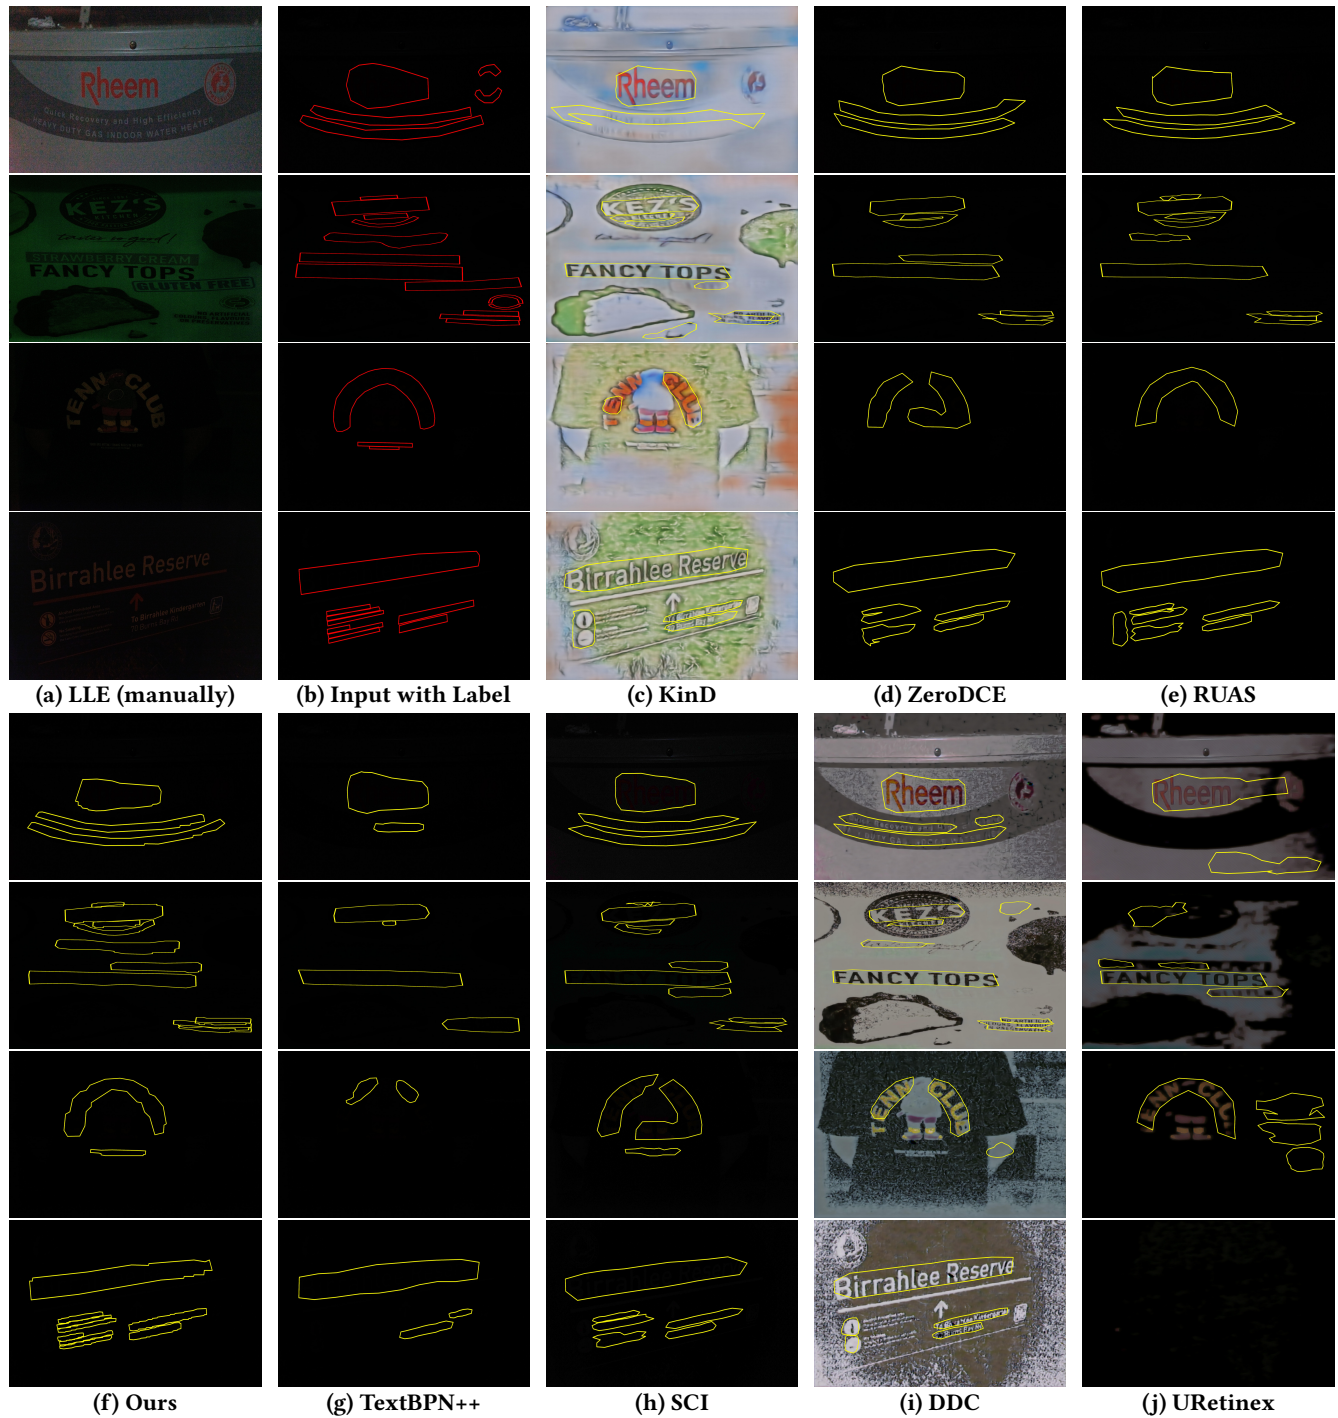

Figure 3: More Comparison against enhancement-based methods (Part 3). (a) Manually enhanced image. (b) Input low-light image with label(c)-(e) and (h)-(j). Fine-tuned results of low-light enhancement methods with TextBPN++. (g) Fully Supervised TextBPN++. (f) Our method.



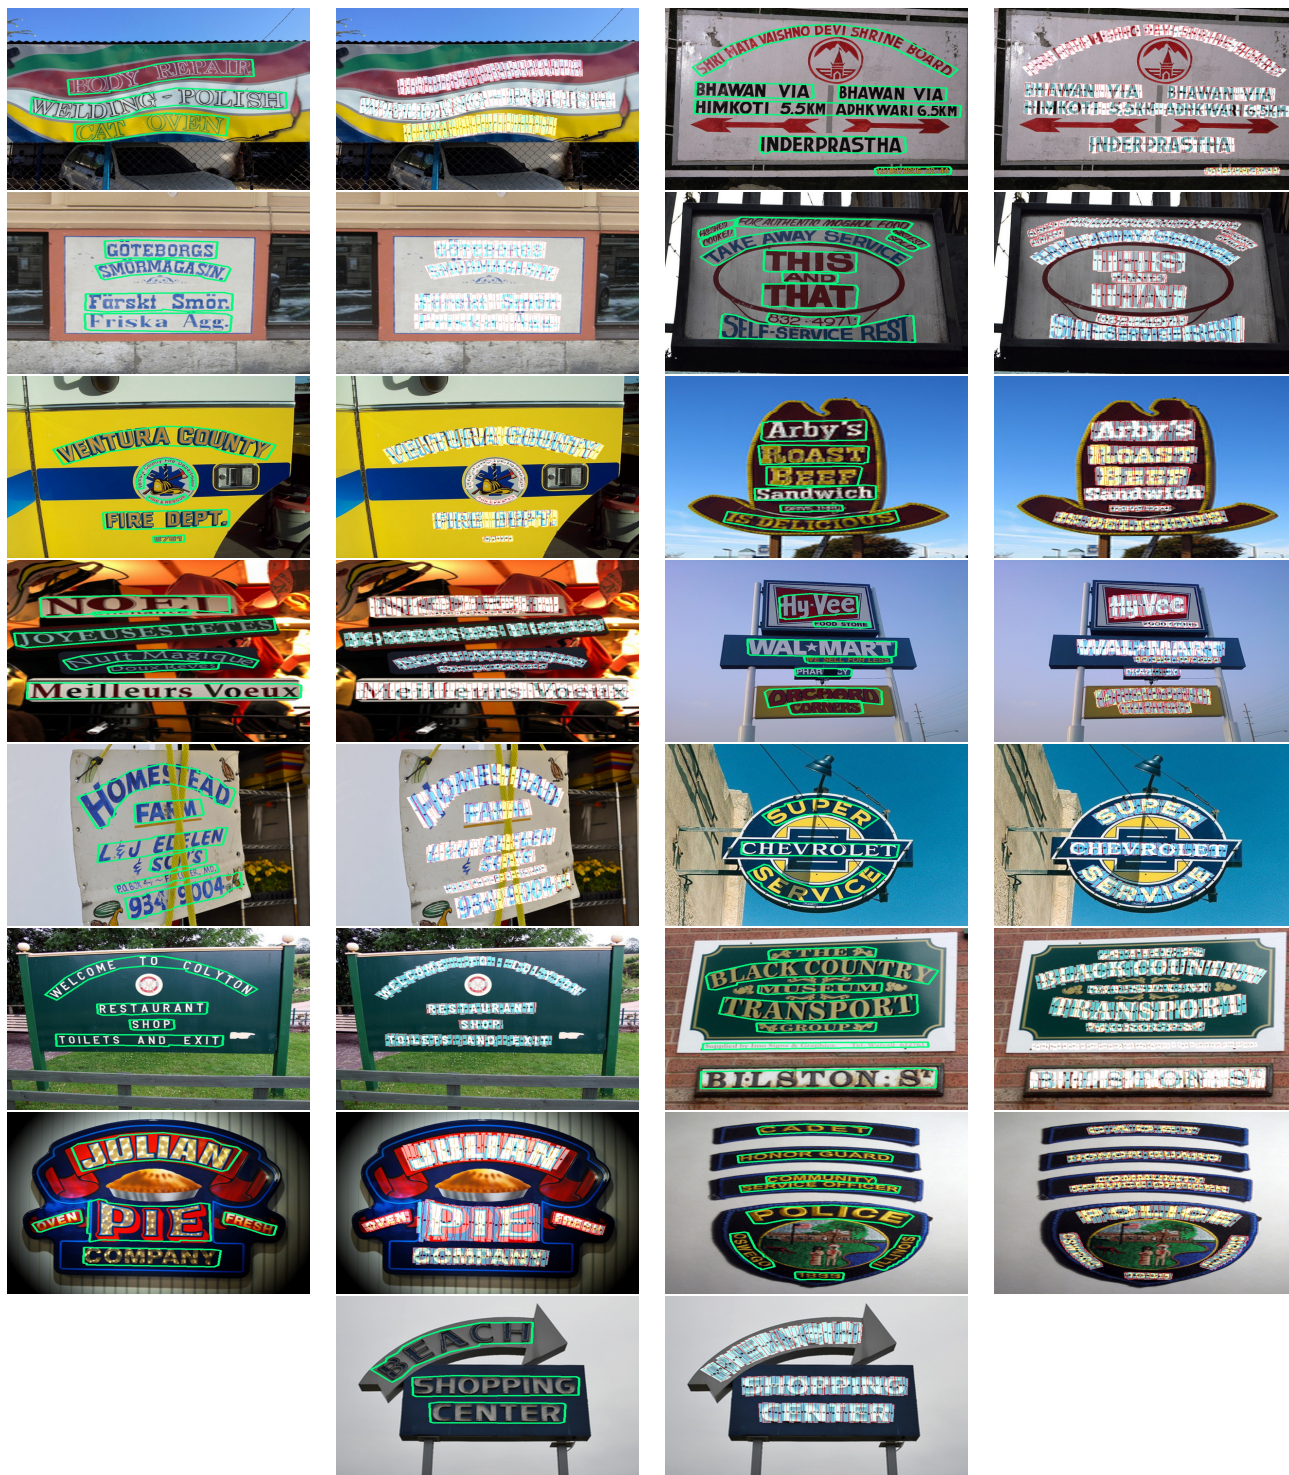

Figure 4: Some of text detection results and rectangular text shaping on normal light datasets.
